# Supplementary material for: Cellular engagement of the SARS-CoV-2 macrodomain by GS-441524 and enhanced in vitro inhibition by its diphosphorylated metabolite
Source: Royal Society of Chemistry journal article supplement (doi:10.1039/d6cb00139d), 2026-06-18
Supplement: d6cb00139d1.pdf [file d6cb00139d1.pdf]

## Supplementary Information

### Cellular Engagement of the SARS-CoV-2 Macrodomein by GS-441524 and Enhanced In Vitro Inhibition by its Diphosphorylated Metabolite

Banhi Biswas<sup>1†\*</sup>, Junlin Zhuo<sup>1†</sup>, Jürgen Bosch<sup>2,3</sup>, Hien Vu<sup>1</sup>, Lorencia Pak<sup>1</sup>, Rameez Raja<sup>1</sup>, Anuradha Roy<sup>4</sup>, Alessandro Panattoni<sup>5</sup>, Michal Maryska<sup>5</sup>, Petr Slavik<sup>5</sup>, Kryštof Šigut<sup>5</sup>, Anthony R. Fehr<sup>6</sup>, Rachy Abraham<sup>1</sup>, Barbara S. Slusher<sup>7,8</sup>, Takashi Tsukamoto<sup>7,8</sup>, Anthony K. L. Leung<sup>1,9,10,11\*</sup>

<sup>1</sup> Department of Biochemistry and Molecular Biology, Bloomberg School of Public Health, Johns Hopkins University, Baltimore, Maryland, United States

<sup>2</sup> Center for Global Health and Diseases, Case Western Reserve University, Cleveland, Ohio, United States

<sup>3</sup> InterRayBio, LLC, Cleveland, Ohio, United States

<sup>4</sup> High Throughput Screening Laboratory, Del M. Shankel Structural Biology Center, Kansas, Lawrence, United States

<sup>5</sup> SigutLabs, Praha, Czech Republic

<sup>6</sup> Department of Molecular Biosciences, University of Kansas, Lawrence, United States

<sup>7</sup> Department of Neurology, Johns Hopkins University School of Medicine, Baltimore, Maryland, United States

<sup>8</sup> Johns Hopkins Drug Discovery, Johns Hopkins University School of Medicine, Baltimore, Maryland, United States

<sup>9</sup> Department of Molecular Biology and Genetics, Johns Hopkins University, Baltimore, Maryland, US

<sup>10</sup> McKusick-Nathans Department of Genetic Medicine, Johns Hopkins University, Baltimore, Maryland, United States

<sup>11</sup> Department of Oncology, School of Medicine, Johns Hopkins University, Baltimore, Maryland, United States

\*Corresponding authors, Email: [anthony.leung@jhu.edu](mailto:anthony.leung@jhu.edu), [bbiswas1@jh.edu](mailto:bbiswas1@jh.edu)

†These authors contributed equally to the work

## Synthesis of phosphorylated derivatives of GS-441524

*Reagents:* Reagents and solvents were purchased from Fluorochem, Sigma–Aldrich and AlfaAesar. Trimethylphosphate and phosphorus(V)oxychloride were dried by distillation. CH<sub>3</sub>CN was degassed under a positive stream of argon just before its use. Unless otherwise stated, all the reactions were performed under a positive atmosphere of argon by standard syringe, cannula and septa techniques. Reactions were monitored by thin-layer chromatography (TLC) using Merck silica gel 60 F254 plates and visualized by UV (254 nm). Purifications of nucleoside phosphates were performed using HPLC (Waters modular HPLC system) on a column packed with 10 μm C18 reversed phase (Phenomenex, Luna C18 (2) 100 Å). NMR spectra were measured on a Bruker AVANCE 400 in D<sub>2</sub>O solutions at 25 °C. Chemical shifts (in ppm, δ scale) were referenced to the residual solvent signal in <sup>1</sup>H spectra. Coupling constants (*J*) are given in Hz. HPLC-MS analyses were performed on Shimadzu UFLC-MS-2020 system with ESI. Column: Acquity UPLC BEH C18 1.7 μm, 2.1x50 mm. Solvent A: H<sub>2</sub>O + 0.1% HCOOH; Solvent B: CH<sub>3</sub>CN + 0.1% COOH. Total flow 0.6 ml/min. Total time of the method 10 min. The mass spectrum was recorded in the range 100-1500 m/z both in positive and negative mode with event time 0.2 s. or in the range 350-1300 m/z in positive mode with event time 0.2 s.

### *GS-441524 monophosphate*

The commercially available nucleoside GS-441524 (CAS No.: 1191237-69-0, 10 mg, 0.034 mmol) was dried under vacuum for 2 hours at 50 °C. The solid was dissolved in dry trimethylphosphate (300 μL) and the resulting solution was cooled to 0 °C. Freshly distilled POCl<sub>3</sub> (1.2 equiv., 0.04 mmol, 6 mg, 4 μL) was added and the reaction mixture was stirred at 0 °C for 1 hour. The reaction was quenched by dropwise addition of cold 2M TEAB (1 mL). The mixture was concentrated on a rotary evaporator and the residue was co-evaporated several times with milli-Q water. The crude product was dissolved in water (ca 3 mL), filtered and purified by semi-preparative HPLC using a linear gradient of methanol (5→100%) in 0.1 M TEAB buffer. The appropriate fractions were combined and evaporated on a rotary evaporator. The viscous oil was co-evaporated three times with milli-Q water and the product was finally freeze-dried from water to obtain a white solid (11 mg, triethylammonium salt, 66% yield).

<sup>1</sup>H NMR (400 MHz, D<sub>2</sub>O) δ 7.77 (s, 1H), 6.83 (d, *J* = 4.7 Hz, 1H), 6.67 (d, *J* = 4.7 Hz, 1H), 4.83 (d, *J* = 5.6 Hz, 1H), 4.47 – 4.32 (m, 3H), 3.95 – 3.81 (m, 2H). <sup>31</sup>P NMR (162 MHz, D<sub>2</sub>O) δ 4.87. MS (calcd. for C<sub>12</sub>H<sub>14</sub>N<sub>5</sub>O<sub>7</sub>P): 371.063; found [M+H]<sup>+</sup> 372.10; found [M-H]<sup>-</sup> 370.10.

# <sup>1</sup>H NMR of GS-441524 monophosphate

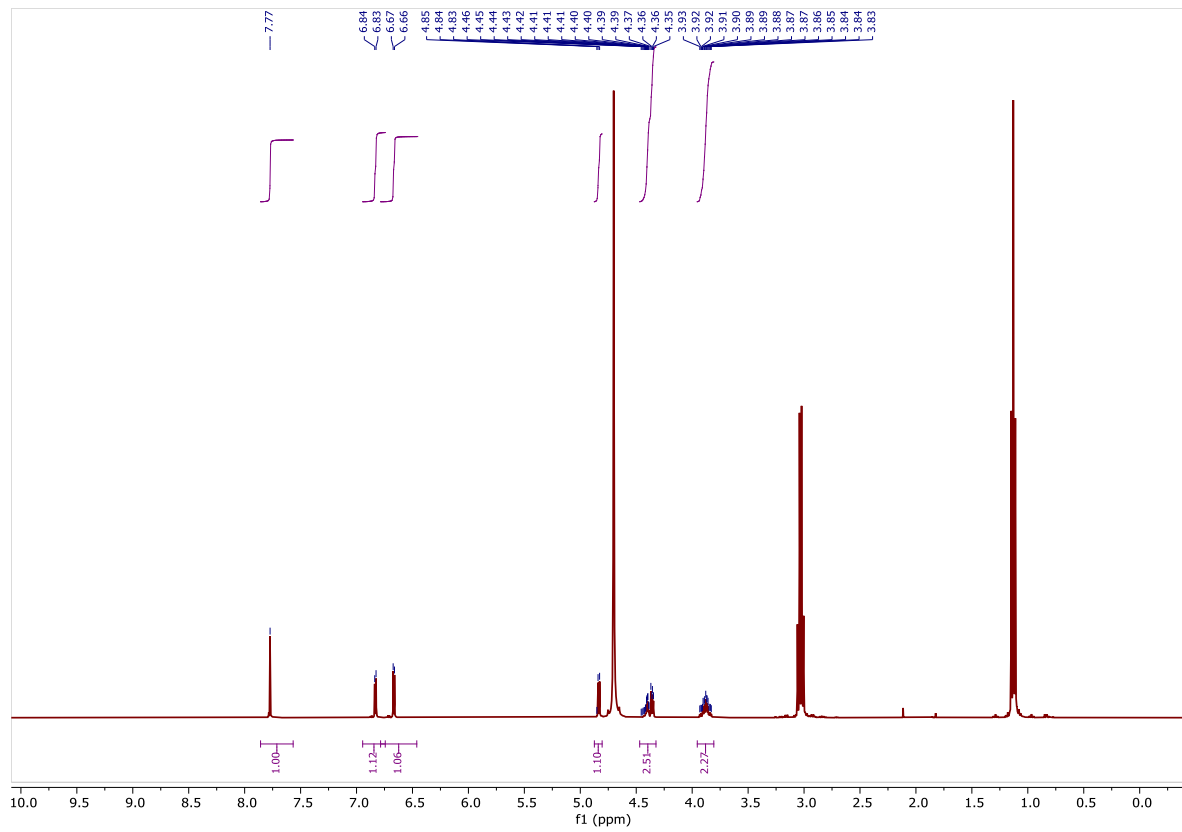

# <sup>31</sup>P NMR of GS-441524 monophosphate

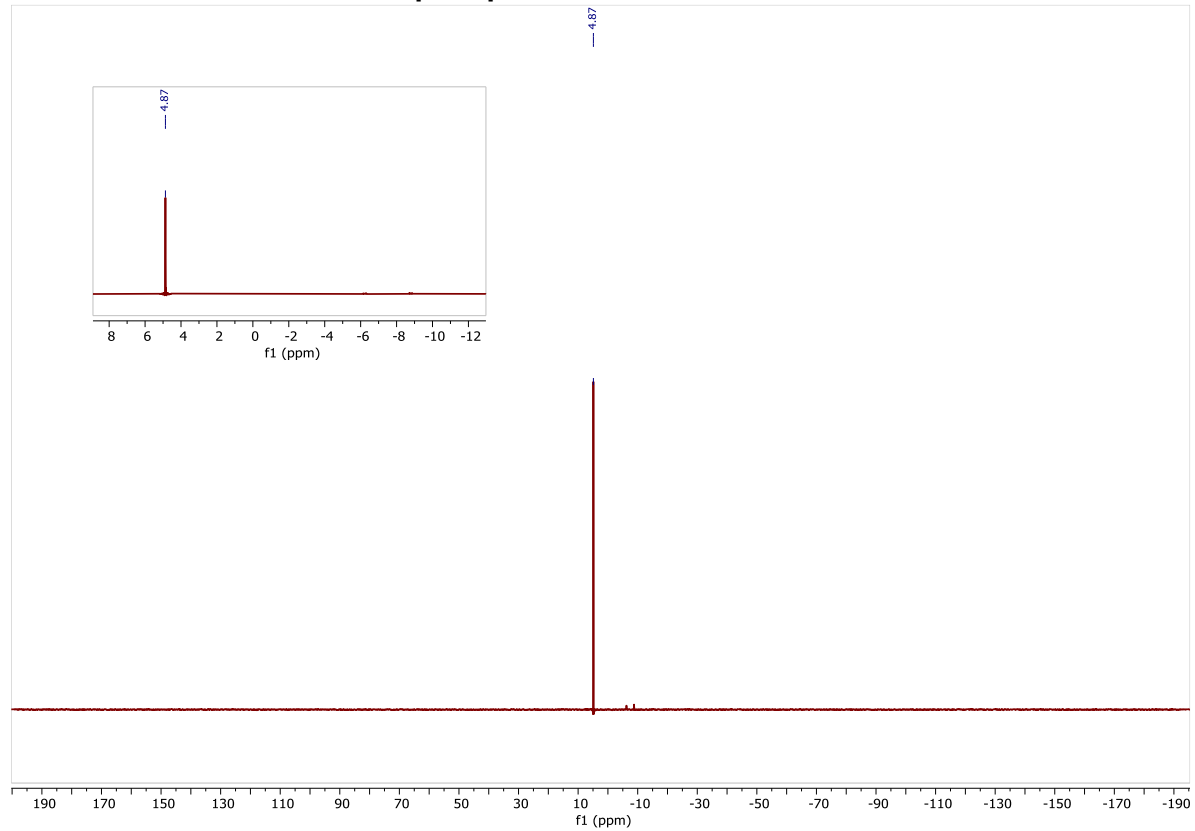

## Mass analysis of GS-441524 monophosphate

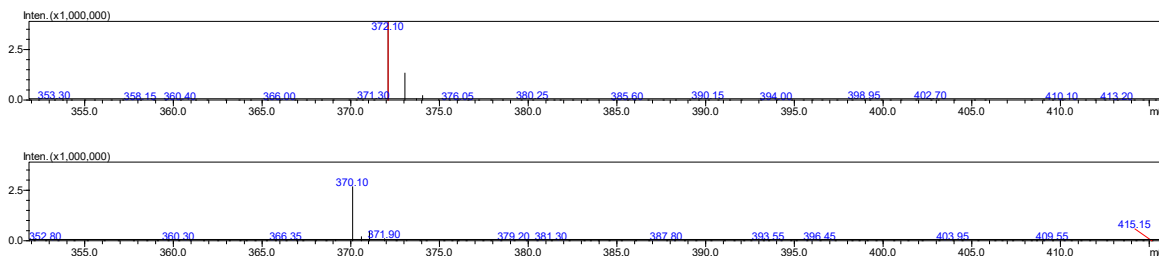

## GS-441524 diphosphate

The commercially available nucleoside GS-441524 (CAS No.: 1191237-69-0, 50 mg, 0.172 mmol) was dried under vacuum for 2 hours at 50 °C. The solid was dissolved in dry trimethylphosphate (750  $\mu$ L) and the resulting solution was cooled at 0 °C. Freshly distilled POCl<sub>3</sub> (1.2 equiv., 0.206 mmol, 32 mg, 19.3  $\mu$ L) was added and the reaction mixture was stirred at 0 °C for 1 hour. Then, an ice-cold solution of tributylammonium orthophosphate (5 equiv., 0.86 mmol, 402 mg) and tributylamine (5 equiv., 0.86 mmol, 159 mg, 204  $\mu$ L) in anhydrous acetonitrile (2 mL) was added dropwise to the reaction mixture at 0 °C. The reaction mixture was stirred for 1.5 hour at 0 °C and then quenched by dropwise addition of cold 2M TEAB (1 mL). The mixture was concentrated on a rotary evaporator and the residue was co-evaporated several times with milli-Q water. The crude product was dissolved in water (ca 3 mL), filtered and purified by semi-preparative HPLC using a linear gradient of methanol (5 $\rightarrow$ 100%) in 0.1 M TEAB buffer. The appropriate fractions were combined and evaporated on a rotary evaporator. The viscous oil was co-evaporated three times with milli-Q water and the product was finally freeze-dried from water to obtain a white solid (25 mg, triethylammonium salt, 23% yield).

<sup>1</sup>H NMR (401 MHz, D<sub>2</sub>O)  $\delta$  7.83 (s, 1H), 6.92 (d,  $J$  = 4.7 Hz, 1H), 6.81 (d,  $J$  = 4.8 Hz, 1H), 4.88 (d,  $J$  = 4.8 Hz, 1H), 4.42 (dd,  $J$  = 5.9, 2.5 Hz, 2H), 4.06 (dd,  $J$  = 6.3, 3.1 Hz, 1H), 4.03 – 3.94 (m, 1H). <sup>31</sup>P NMR (162 MHz, D<sub>2</sub>O)  $\delta$  -8.24 (d,  $J$  = 19.4 Hz), -8.88 (d,  $J$  = 19.9 Hz), -20.67 (t,  $J$  = 19.7 Hz). MS (calcd. for C<sub>12</sub>H<sub>15</sub>N<sub>5</sub>O<sub>10</sub>P<sub>2</sub>): 451.029; found [M+H]<sup>+</sup> 452.05; found [M-H]<sup>-</sup> 449.95.

### <sup>1</sup>H NMR of GS-441524 diphosphate

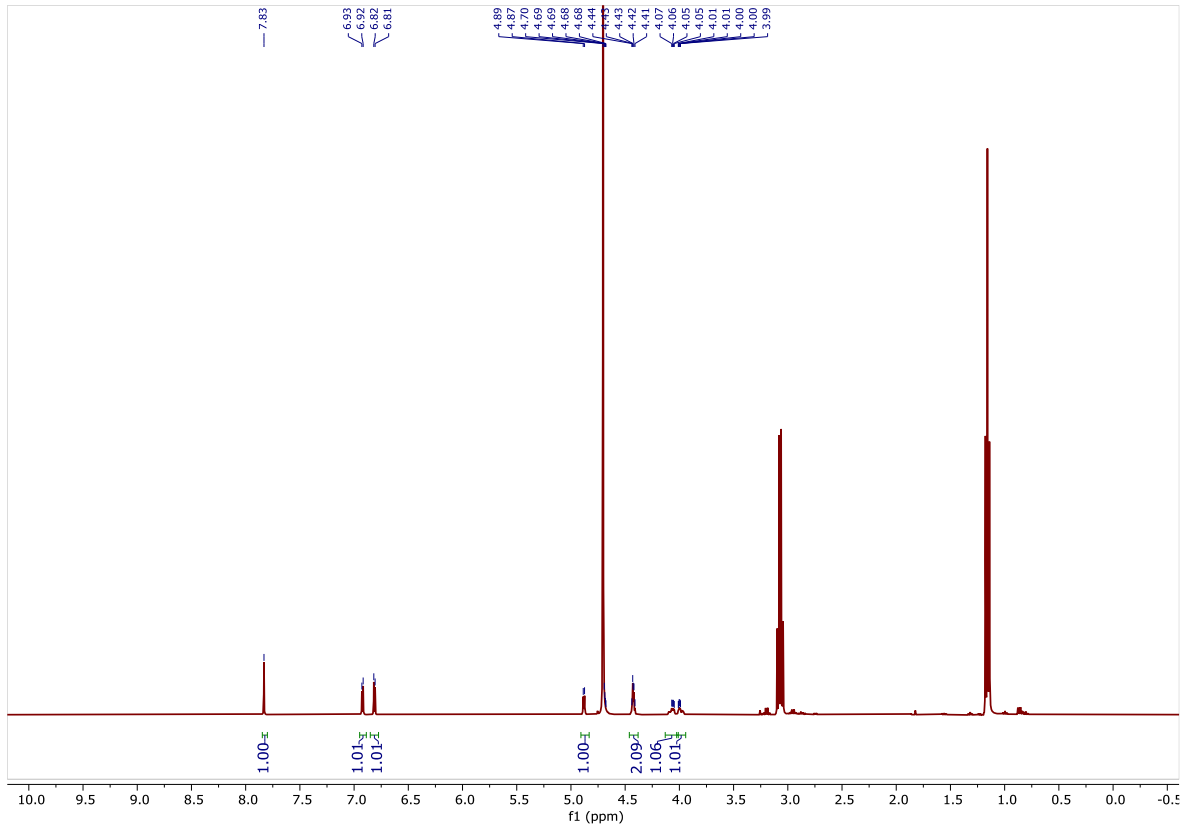

### <sup>31</sup>P NMR of GS-441524 diphosphate

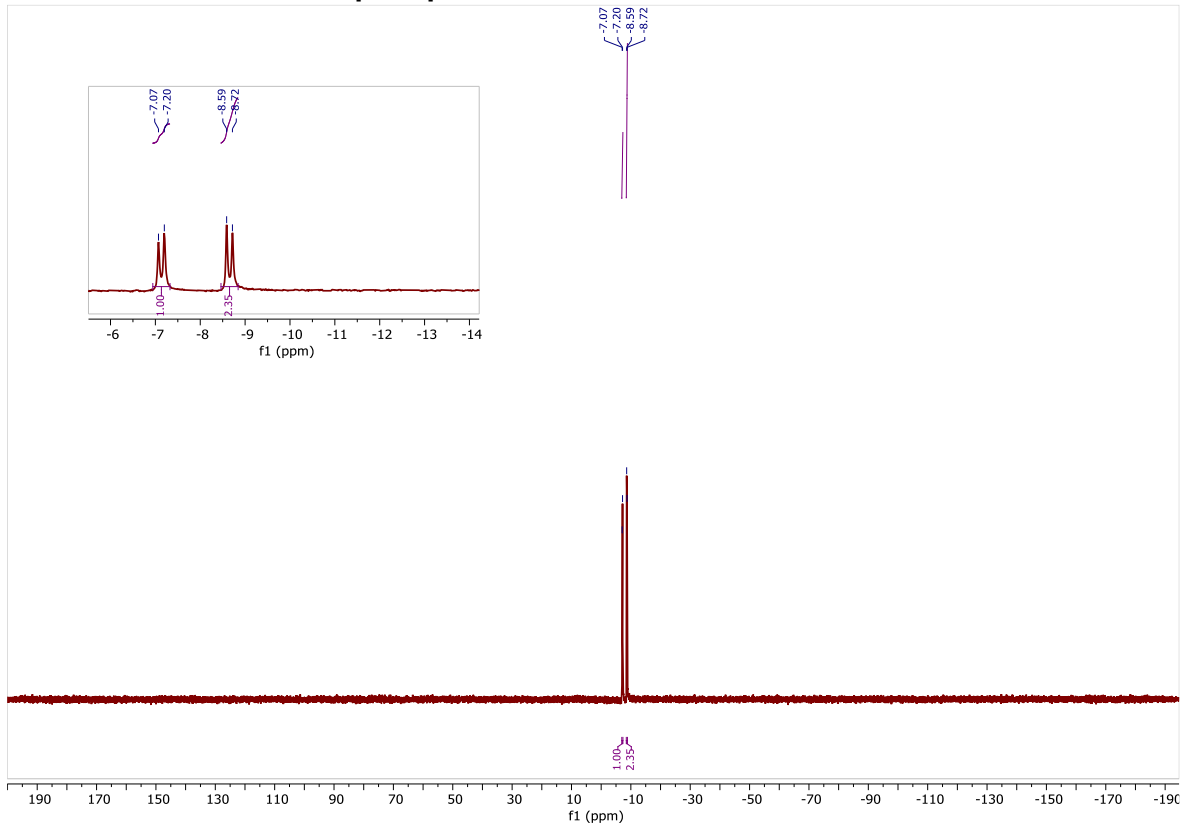

## Mass analysis of GS-441524 diphosphate

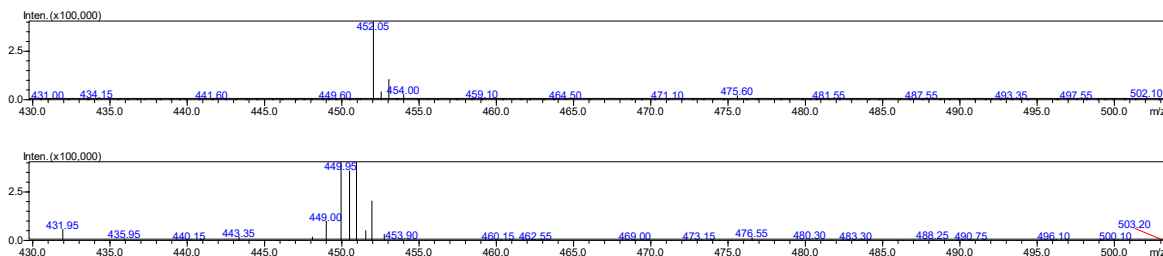

## GS-441524 triphosphate

The commercially available nucleoside GS-441524 (CAS No.: 1191237-69-0, 50 mg, 0.172 mmol) was dried under vacuum for 2 hours at 50 °C. The solid was dissolved in dry trimethylphosphate (750  $\mu$ L) and the resulting solution was cooled at 0 °C. Freshly distilled POCl<sub>3</sub> (1.2 equiv., 0.206 mmol, 32 mg, 19.3  $\mu$ L) was added and the reaction mixture was stirred at 0 °C for 1 hour. Then, an ice-cold solution of tributylammonium pyrophosphate (5 equiv., 0.86 mmol, 471 mg) in anhydrous acetonitrile (6 mL) was added dropwise to the reaction mixture at 0 °C. The reaction mixture was stirred for 1 hour at 0 °C and then quenched by dropwise addition of cold 2M TEAB (1 mL). The mixture was concentrated on a rotary evaporator and the residue was co-evaporated several times with milli-Q water. The crude product was dissolved in water (ca 3 mL), filtered and purified by semi-preparative HPLC using a linear gradient of methanol (5 $\rightarrow$ 100%) in 0.1 M TEAB buffer. The appropriate fractions were combined and evaporated on a rotary evaporator. The viscous oil was co-evaporated three times with milli-Q water and the product was finally freeze-dried from water to obtain a white solid (83 mg, triethylammonium salt, 58% yield).

<sup>1</sup>H NMR (401 MHz, Deuterium Oxide)  $\delta$  7.87 (s, 1H), 6.97 (d,  $J$  = 4.8 Hz, 1H), 6.91 (d,  $J$  = 4.7 Hz, 1H), 4.93 – 4.86 (m, 1H), 4.44 (dd,  $J$  = 3.4, 1.8 Hz, 2H), 4.17 – 4.07 (m, 1H), 4.07 – 3.97 (m, 1H). <sup>31</sup>P NMR (162 MHz, Deuterium Oxide)  $\delta$  -8.24 (d,  $J$  = 19.4 Hz), -8.88 (d,  $J$  = 19.9 Hz), -20.67 (t,  $J$  = 19.7 Hz). MS (calcd. for C<sub>12</sub>H<sub>16</sub>N<sub>5</sub>O<sub>13</sub>P<sub>3</sub>): 530.996; found [M+H]<sup>+</sup> 531.90; found [M-H]<sup>-</sup> 529.70.

### <sup>1</sup>H NMR of GS-441524 triphosphate

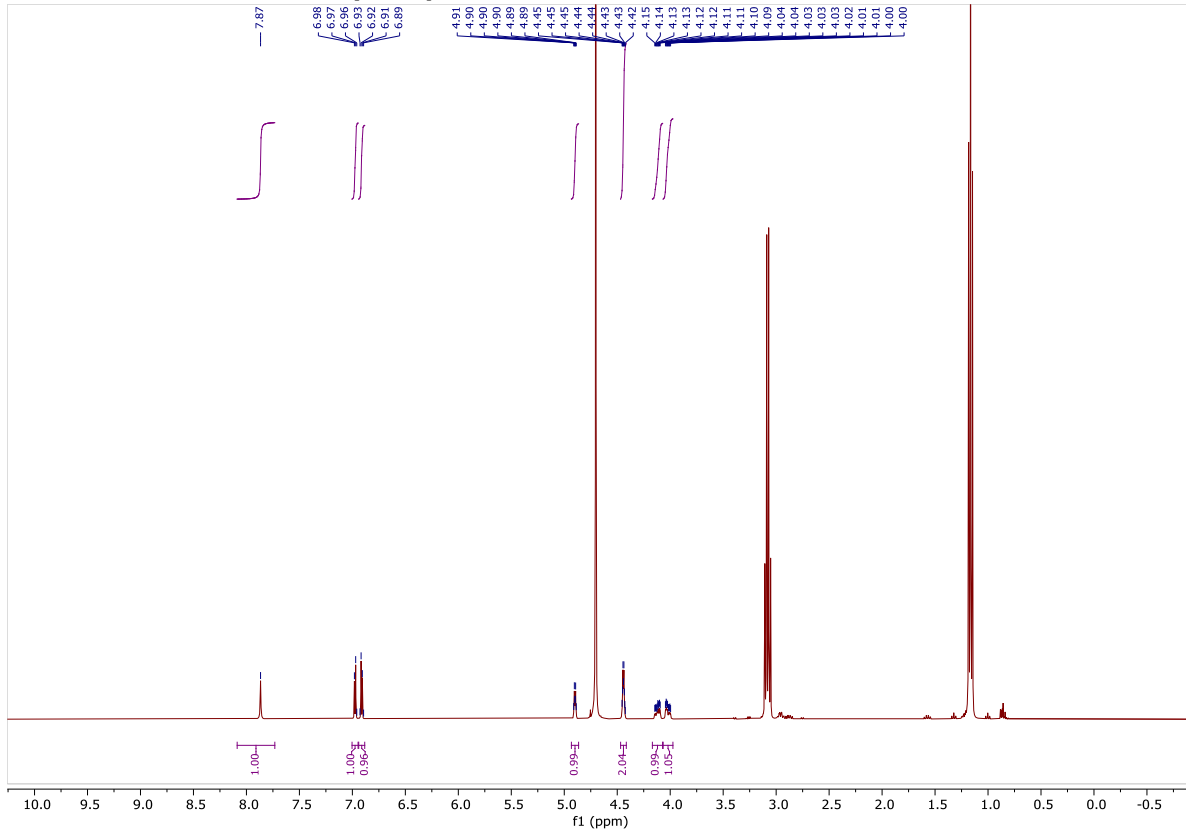

### <sup>31</sup>P NMR of GS-441524 triphosphate

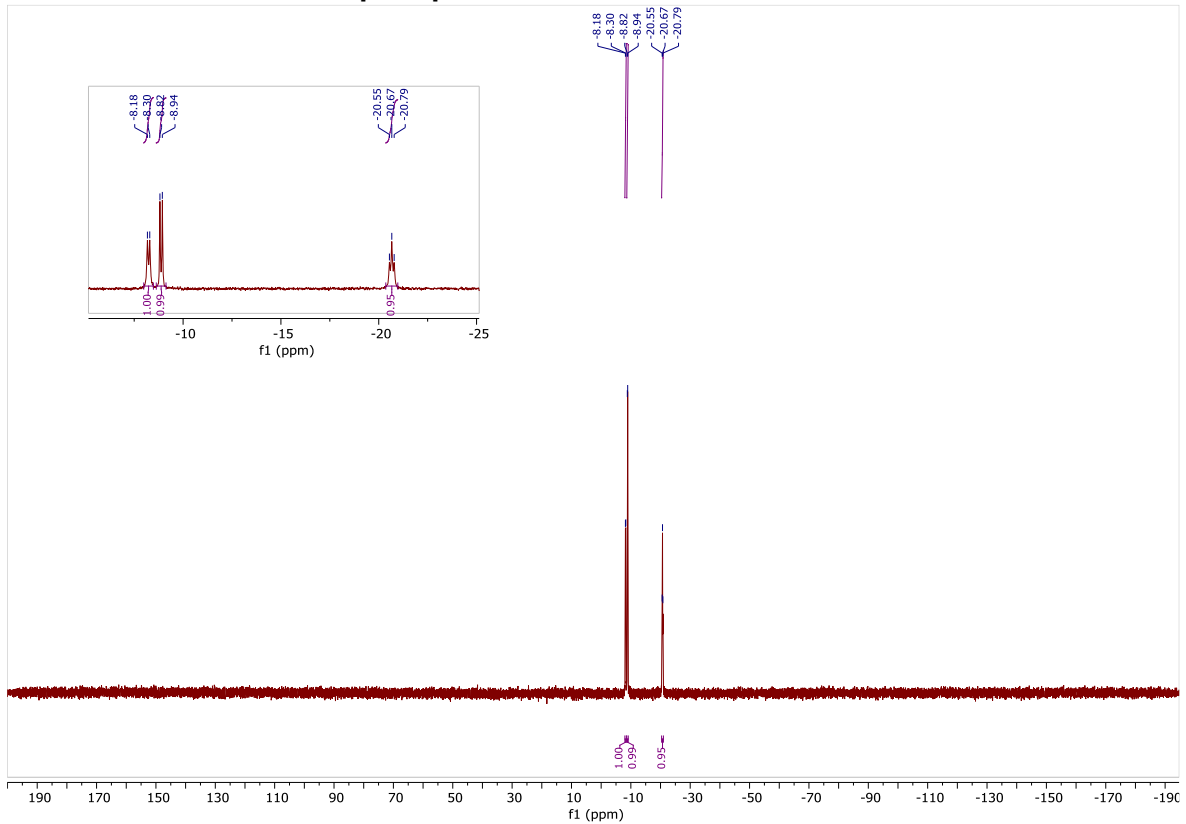

# Mass analysis of GS-441524 triphosphate

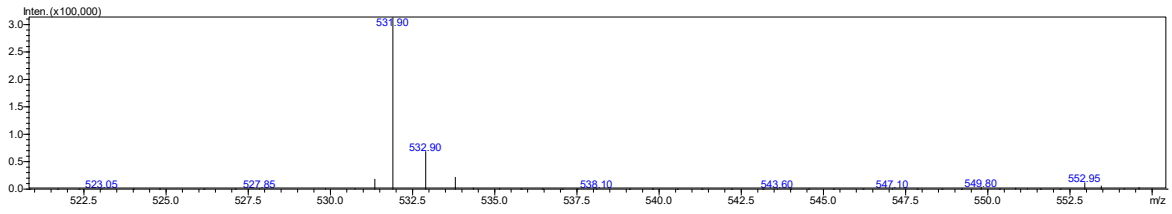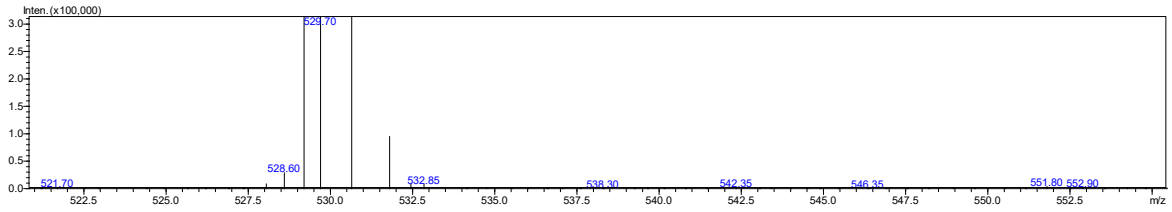

**Figure S1**

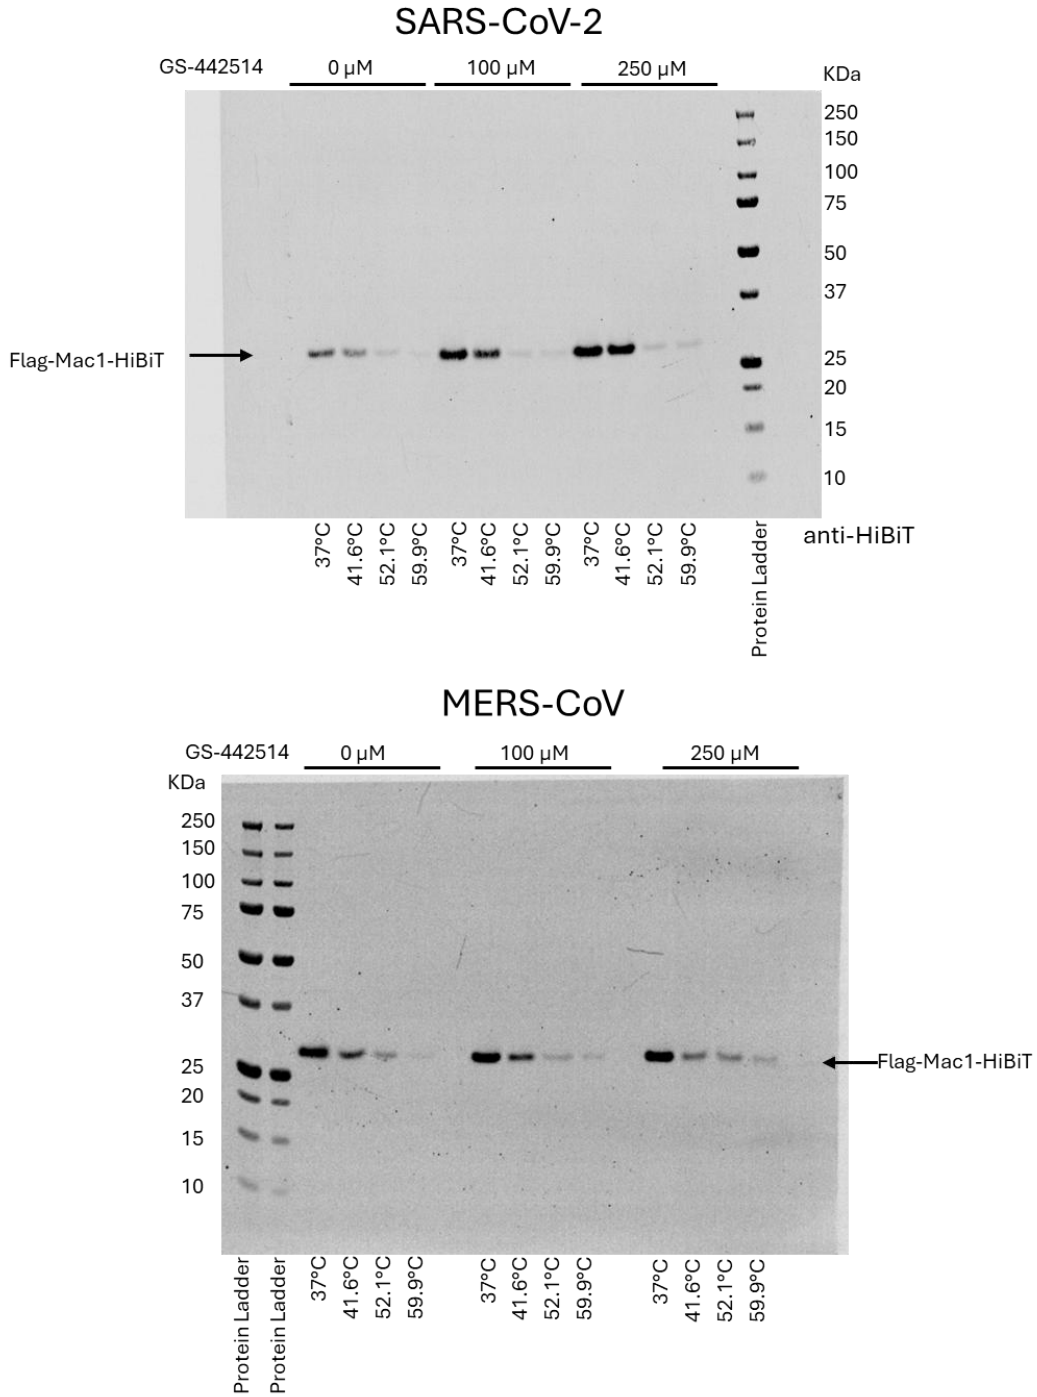

**Figure S1:** Full-length blots for Figure 1E. Western blot showing a dose-dependent stabilization of SARS-CoV-2 Mac1 but not MERS-CoV Mac1 at different temperatures using anti-HiBiT antibody.

Figure S2

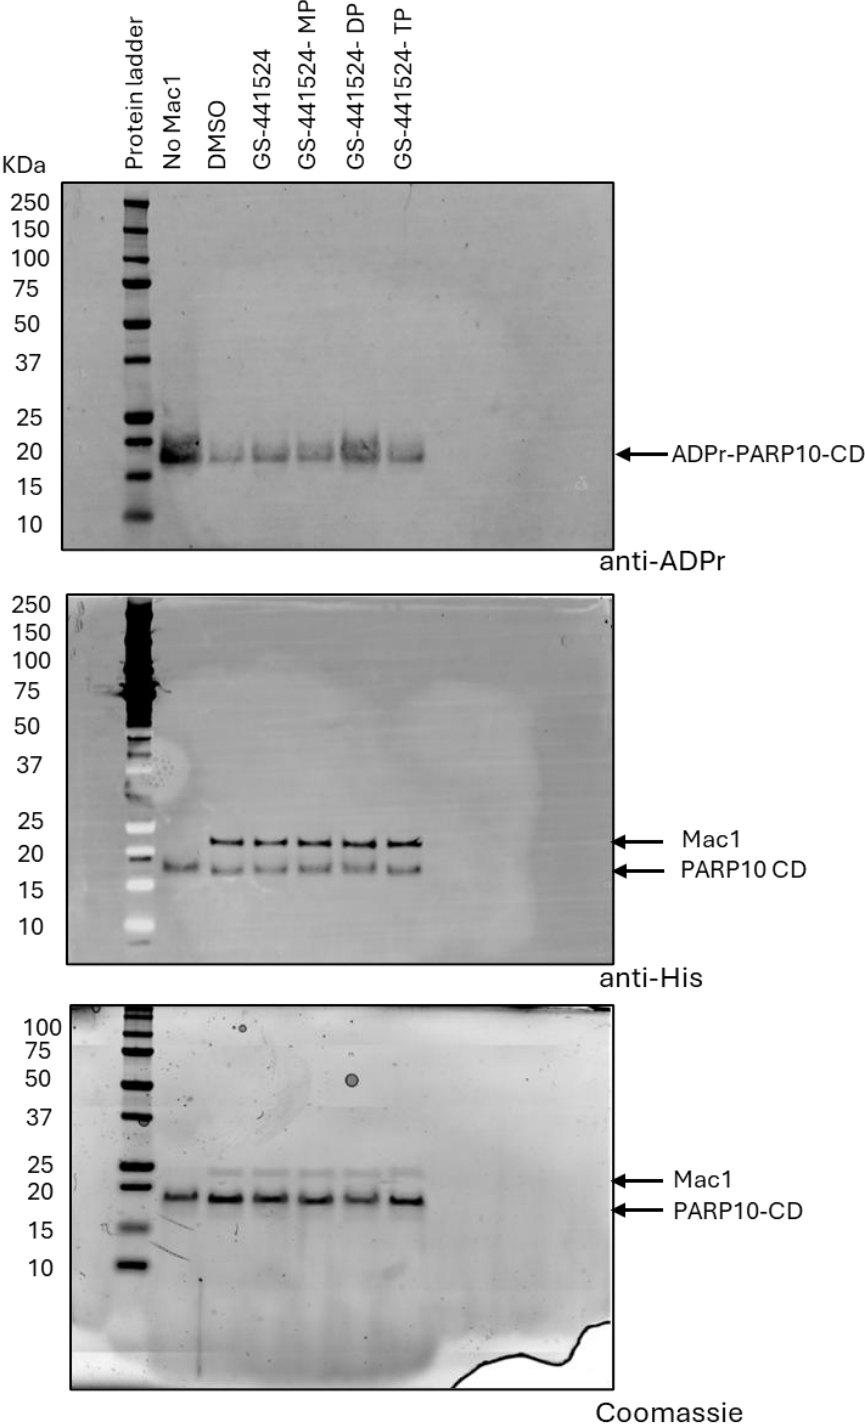

**Figure S2:** Full-length Gels and blots for Figure 2D. Western blot showing inhibition of Mac1, indicated by increased ADP-ribosylated substrate signal upon treatment with GS-441524 or its phosphorylated derivatives compared with DMSO control. His-tagged PARP-10 ADP-ribosylated substrate and the His-tagged Mac1 used in the reaction are probed using anti-His antibody and monitored using Coomassie stain to show equal input amounts across different treatments.

**Figure S3**

A

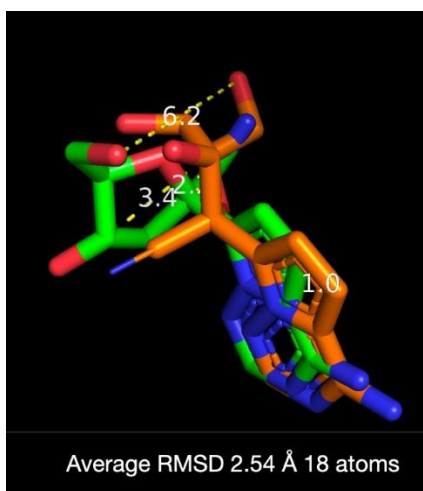

B

7BF6

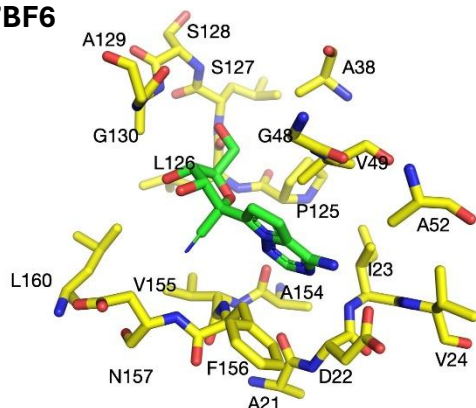

Docked

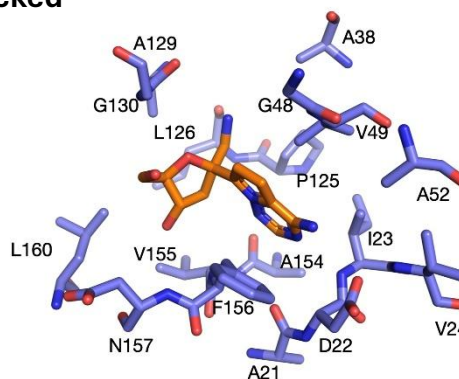

**Figure S3:** A. Comparison of docked GS-441524 with its crystal structure (PDB: 7BF6), demonstrating excellent agreement between the predicted and observed structures bound to SARS-CoV-2 Mac1. B. Comparison of network interactions of GS-441524 with the SARS-CoV-2 Mac1 in the crystal structure vs the docked pose. Residues within 5 Å of either the

docked ligand or the ligand in the crystal structure (7BF6) are shown. In the predicted structure, the ribose adopts a flipped conformation, positioning S128 and S127 approximately 6 Å away; consequently, these residues are not observed in the docked pose.
